# Supplementary material for: A N,P-co-doped 3D graphene/cobalt-embedded electrocatalyst for the oxygen reduction reaction
Source: Royal Society of Chemistry journal article supplement (doi:10.1039/c7nj02765f), 2017-01-01
Supplement: c7nj02765f1.pdf [file c7nj02765f1.pdf]

## Electronic Supplementary Information

### **N,P-co-doped 3D Graphene/Cobalt-Embedded Electrocatalyst for Oxygen Reduction Reaction**

**Xiao-Li Hu, Xu-Hong Dai, Xing-Quan He\***

*School of Chemistry and Chemical Engineering, Changchun University of Science  
and Technology, Changchun 130022, P. R. China*

---

\* Corresponding author. Tel.+86-431-85583430

E-mail address: hexingquan@hotmail.com (Xingquan He)

**Table S1** Related atom contents of the samples determined by XPS analysis.

|                 | Co Content (%) | N Content (%) | P Content (%) |
|-----------------|----------------|---------------|---------------|
| Co/N,P-GAs-800  | 0.37           | 2.86          | 0.14          |
| Co/N,P-GAs-900  | 0.29           | 2.93          | 0.12          |
| Co/N,P-GAs-1000 | 0.23           | 1.63          | 0.11          |
| N-GAs-900       | 0              | 1.80          | 0             |

**Table S2** Related N atom contents of the samples determined by XPS analysis.

| Samples        | N           | Pyridinic N |             | Pyrrolic N |             | Graphitic N |             |
|----------------|-------------|-------------|-------------|------------|-------------|-------------|-------------|
|                | Content (%) | B.E. (eV)   | Content (%) | B.E. (eV)  | Content (%) | B.E. (eV)   | Content (%) |
| Co/N,P-GAs-900 | 2.93        | 398.2       | 0.79        | 399.3      | 0.82        | 401.1       | 1.32        |
| N-GAs-900      | 1.80        | 398.2       | 0.49        | 399.3      | 0.32        | 401.1       | 0.99        |

**Table S3** Relative surface concentrations of nitrogen species obtained by fitting high-resolution N1s XPS spectra of samples.

| Samples         | pyridinic-N | pyrrolic-N | graphitic-N |
|-----------------|-------------|------------|-------------|
| Co/N,P-GAs-800  | 29.68       | 28.71      | 41.61       |
| Co/N,P-GAs-900  | 27.19       | 27.82      | 44.99       |
| Co/N,P-GAs-1000 | 22.52       | 26.78      | 50.70       |

**Table S4** Relative surface concentrations of phosphorus species obtained by fitting high-resolution P 2p XPS spectra of samples.

| Samples         | P-C   | P-N   | C-O-PO <sub>3</sub> |
|-----------------|-------|-------|---------------------|
| Co/N,P-GAs-800  | 60.71 | 24.41 | 14.88               |
| Co/N,P-GAs-900  | 33.99 | 34.99 | 31.02               |
| Co/N,P-GAs-1000 | 57.73 | 13.41 | 28.86               |

**Table S5** The comparison of the ORR performance of different catalysts in 0.1 M KOH electrolyte.

| Electrocatalyst                       | $\Delta E_{\text{onset}}^{\text{a,c}}(\text{V})$ | $\Delta E_{1/2}^{\text{a,c}}(\text{V})$ | $j_L^{\text{b,c}}(\text{mA cm}^{-2})$ | Loading<br>( $\mu\text{g cm}^{-2}$ ) | Reference<br>electrode | Ref.      |
|---------------------------------------|--------------------------------------------------|-----------------------------------------|---------------------------------------|--------------------------------------|------------------------|-----------|
| Co/N,P-GAs-900                        | -0.03                                            | -0.02                                   | 5.22                                  | 280                                  | SCE                    | This Work |
| N-G <sub>750</sub>                    | ~-0.11                                           | ~-0.17                                  | 4.27                                  | Not given                            | Ag/AgCl                | 1         |
| N-doped GNR aerogel                   | 0.01                                             | -0.06                                   | 2.2                                   | Not given                            | Ag/AgCl                | 2         |
| CNPS-900                              | -0.192                                           | -0.056                                  | 3.01                                  | 159                                  | SCE                    | 3         |
| B,N-graphene                          | -0.11                                            | -0.13                                   | 5.2                                   | 280                                  | RHE                    | 4         |
| GNSP-31                               | 0.030                                            | 0.025                                   | 6.39                                  | Not given                            | Ag/AgCl                | 5         |
| PSNG1:10                              | -0.052                                           | 0.015                                   | 5.05                                  | 280                                  | SCE                    | 6         |
| Co <sub>3</sub> O <sub>4</sub> /rmGO  | ~-0.93                                           | -0.07                                   | ~5.00                                 | Not given                            | RHE                    | 7         |
| NiCo <sub>2</sub> O <sub>4</sub> -G   | ~-0.12                                           | ~-0.11                                  | ~-4.10                                | 407                                  | SCE                    | 8         |
| TTF-700-96                            | -0.14                                            | -0.07                                   | 5.0                                   | 300                                  | RHE                    | 9         |
| CoFe <sub>2</sub> O <sub>4</sub> /rGO | -0.136                                           | -0.08                                   | ~-6.40                                | 1006                                 | Ag/AgCl                | 10        |

<sup>a</sup> Represents the difference in onset potential or half-wave potential between the various catalysts and Pt/C.

<sup>b</sup> Represents the diffusion-limited current density of the various catalysts at a rotation speed of 1600 rpm.

<sup>c</sup> The onset potential ( $E_{\text{onset}}$ ), half-wave potential ( $E_{1/2}$ ) and diffusion limited current density ( $j_L$ ) were obtained from the corresponding literatures and the corresponding figures in the present study.

#### Reference:

- [1] Hou Z, Jin Y, Xi X, Huang T, Wu D, Xu P, Liu R (2017) Hierarchically porous nitrogen-doped graphene aerogels as efficient metal-free oxygen reduction catalysts J Colloid Interf Sci 488317-321.
- [2] Gong YJ, Fei HL, Zou XL, Zhou W, Yang SB, Ye GL, Liu Z, Peng ZW, Lou J, Vajtai R, Yakobson BI, Tour JM, Ajayan PM (2015) Boron- and Nitrogen-Substituted

Graphene Nanoribbons as Efficient Catalysts for Oxygen Reduction Reaction. *Chem. Mater* 27: 1181-1186.

[3] Dou S, Shen A, Ma Z L, Wu J H, Tao L, Wang S Y (2015) N-, P- and S-tridoped graphene as metal-free electrocatalyst for oxygen reduction reaction. *J Electroanal. Chem* 753: 21-27.

[4] Zhen Y, Jiao Y, Ge L, Jaroniec M, S Z Qiao (2013) Two-step boron and nitrogen doping in graphene for enhanced synergistic catalysis. *Angew Chem Int Ed* 52: 3110-3116.

[5] F Razmjooei, K P Singh, M Y Song, J S Yu (2014) Enhanced electrocatalytic activity due to additional phosphorous doping in nitrogen and sulfur-doped graphene: A comprehensive study. *Carbon* 78: 257-267.

[6] Wang Y, Zhang B, Xu M, He X (2015) Tunable ternary (P, S, N)-doped graphene as an efficient electrocatalyst for oxygen reduction reaction in an alkaline medium. *Rsc Adv* 5:86746-86753.

[7] Liang YY, Li YG, Wang HL, Zhou JG, Wang J, Regier T, Dai H J (2011) Co<sub>3</sub>O<sub>4</sub> nanocrystals on graphene as a synergistic catalyst for oxygen reduction reaction. *Nat Mater* 10: 780-786.

[8] Lee DU, Kim BJ, Chen ZW (2013) One-pot synthesis of a mesoporous NiCo<sub>2</sub>O<sub>4</sub> nanoplatelet and graphene hybrid and its oxygen reduction and evolution activities as an efficient bi-functional electrocatalyst. *J Mater Chem A* 1: 4754-4762.

[9] L Hao, S Zhang, R Liu, J Ning, G Zhang, L Zhi (2015) Bottom-up construction of triazine-based frameworks as metal-free electrocatalysts for oxygen reduction reaction. *Adv Mater* 27: 3190-3195.

[10] Bian W, Yang Z, Strasser P, Yang R (2014) A CoFe<sub>2</sub>O<sub>4</sub>/graphene nanohybrid as an efficient bi-functional electrocatalyst for oxygen reduction and oxygen evolution. *J Power Sources*, 250: 196-203.

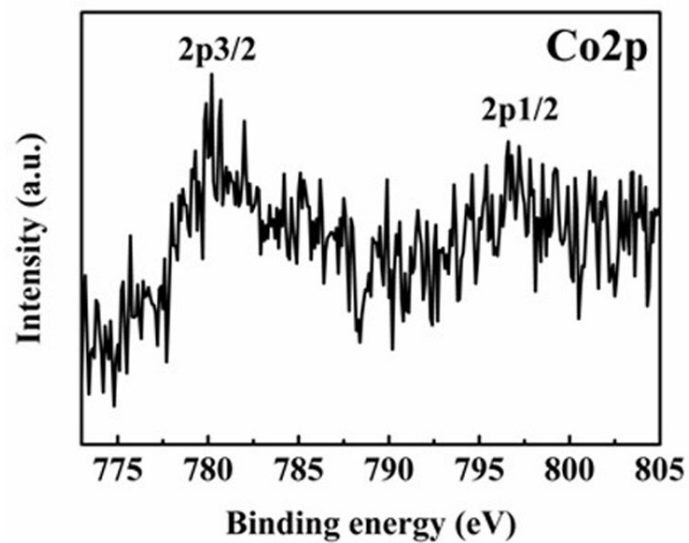

**Fig. S1** High resolution Co 2p spectrum of Co/N,P-GAs-900.

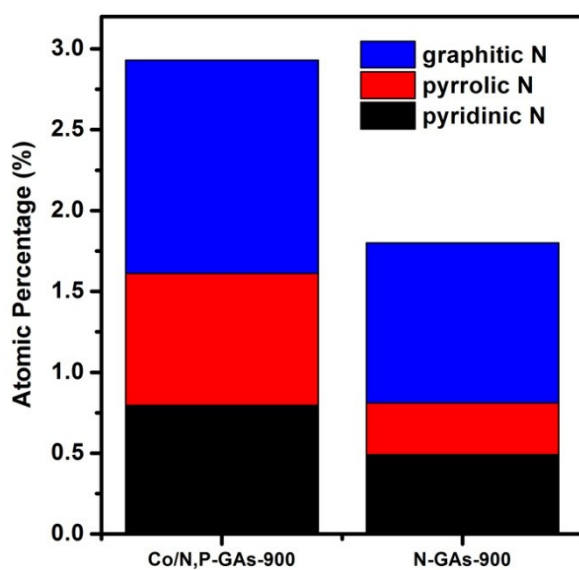

**Fig. S2** The atomic percentages of deconvoluted N 1s peaks of Co/N,P-GAs-900 and N-GAs-900.

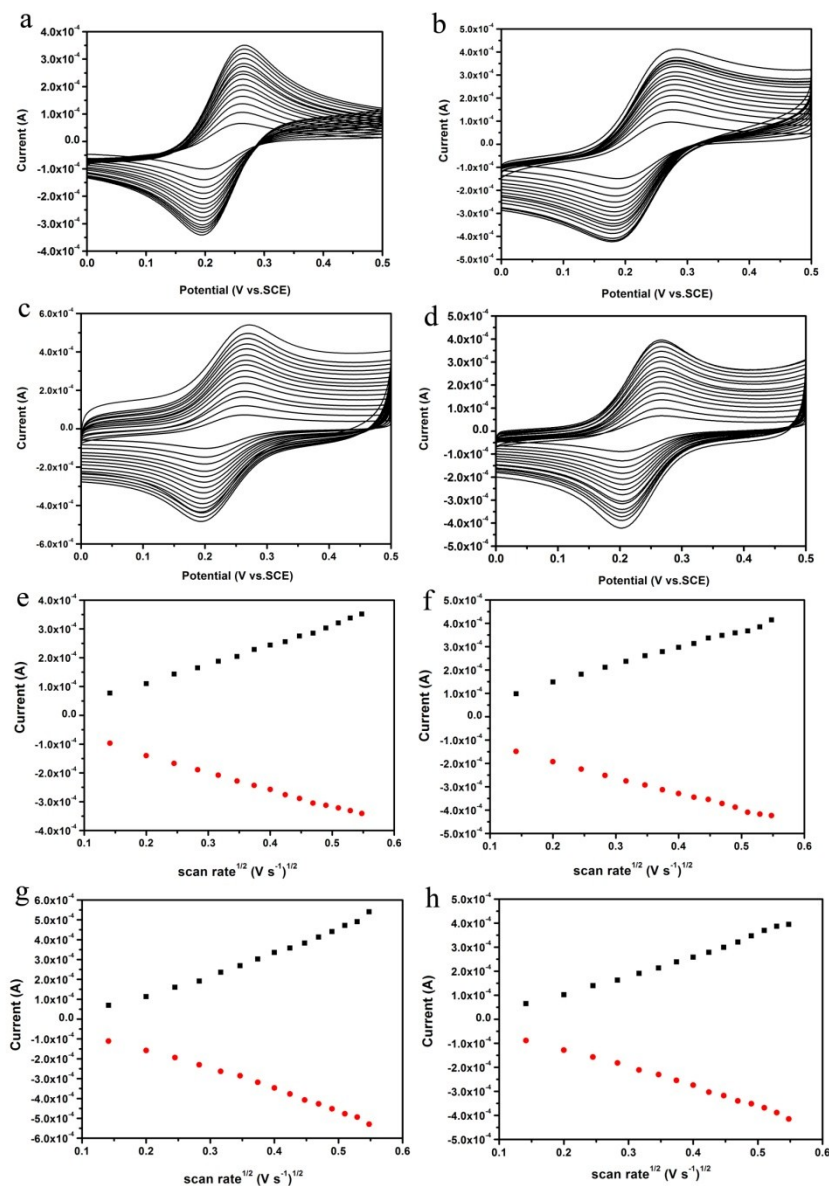

**Fig. S3** CV curves of bare GC electrode (a) Co/N,P-GAs-800 (b), Co/N,P-GAs-900 (c) and Co/N,P-GAs-1000 (d) in 5 mM  $\text{Fe}(\text{CN})_6^{3-/4-}$ /1 M KCl at various scan rates from 20 to 300  $\text{mV s}^{-1}$ ; plots of  $i_p$  vs.  $v^{1/2}$  for bare GC electrode (e) Co/N,P-GAs-800 (f), Co/N,P-GAs-900 (g) and Co/N,P-GAs-1000 (h).

The electrochemically assessable surface area can be estimated according to the Randles-Sevcik equation given below:

$$i_p = 2.99 \times 10^5 n A C D^{1/2} v^{1/2}$$

Where  $i_p$  is the peak current, D and C are the diffusion coefficient and bulk

concentration of the redox probe (5 mM  $\text{K}_3[\text{Fe}(\text{CN})_6]$ ), respectively.  $n$  is the number of electrons transferred ( $n = 1$ ),  $\nu$  is the scan rate and  $A$  is the electrochemically assessable surface area. Consequently, the electrochemically assessable surface areas of Co/N,P-GAs-800, Co/N,P-GAs-900 and Co/N,P-GAs-1000 were estimated according to the slope of the straight line of  $i_p$  versus  $\nu^{1/2}$ .

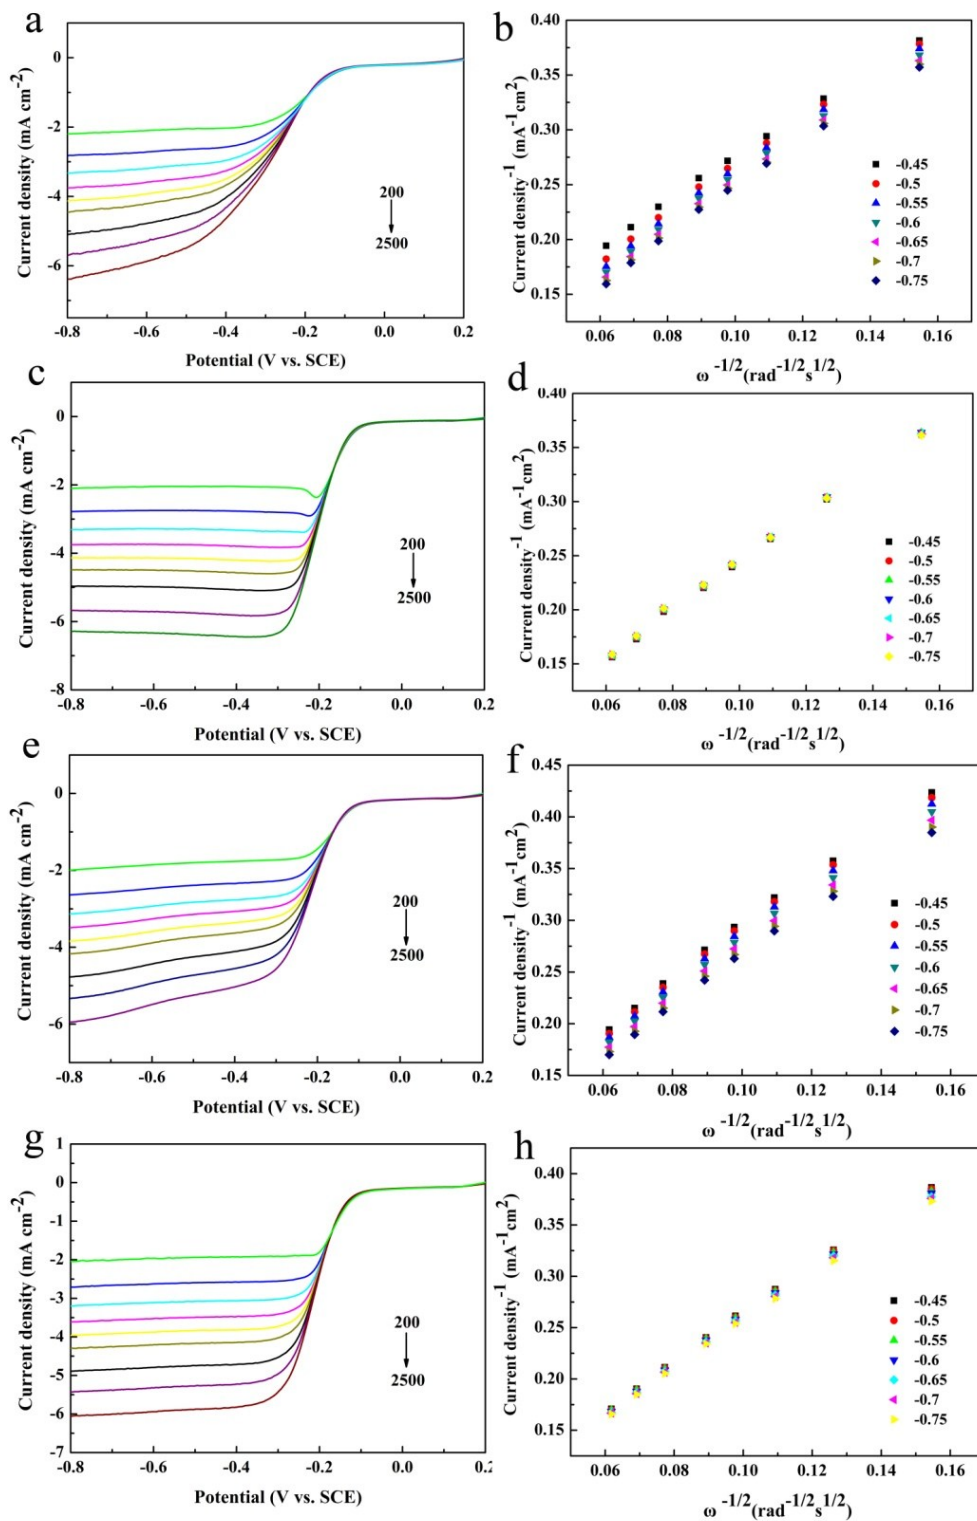

**Fig. S4** LSV curves of (a) N-GA-900, (c) Co/N-GA-900, (e) Co/N,P-GA-800 and (g) Co/N,P-GA-1000 in an O<sub>2</sub>-saturated 0.1 M KOH electrolyte at 1600 rpm with a scan rate of 10 mV s<sup>-1</sup>; The corresponding Koutecky-Levich plots of (b) N-GA-900, (d) Co/N-GA-900, (f) Co/N,P-GA-800 and (h) Co/N,P-GA-1000.

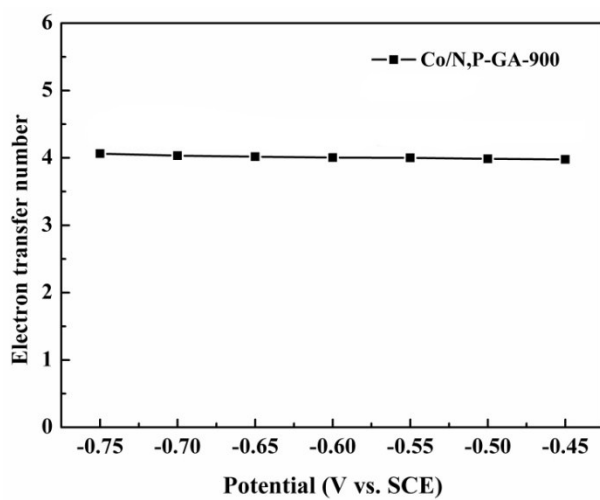

**Fig. S5** The electron transfer number ( $n$ ) of the Co/N,P-GAs-900 according to the K-L plots.

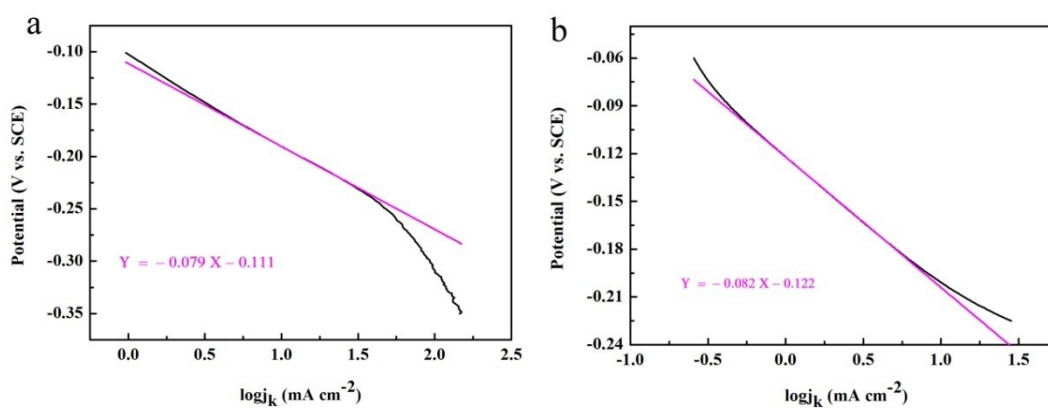

**Fig. S6** Tafel plots obtained from the LSV measurements on the (a) Co/N,P-GAs-900 and (b) Pt/C at the rotation speed of 1600 rpm, respectively.
